# Supplementary material for: Network-Scale Analysis of Sea-Level Rise Impact on Flexible Pavements
Source: MDPI journal article supplement (doi:10.3390/w15234163), 2023-12-01
Supplement: s1 [file s1]

**Table S1.** Road length impacted by rising groundwater table in the high sea-level rise scenario classified by roadway functional classification and TPO region.

| MPO         | Zone | Interstate      |                 | Freeways        |                 | Other Arterial  |                 | Minor Arterial   |                  | Major Collector  |                 | Minor Collector |                | Local           |                 |
|-------------|------|-----------------|-----------------|-----------------|-----------------|-----------------|-----------------|------------------|------------------|------------------|-----------------|-----------------|----------------|-----------------|-----------------|
|             |      | High            | Low             | High            | Low             | High            | Low             | High             | Low              | High             | Low             | High            | Low            | High            | Low             |
| CBD         | 1    | 8.1<br>(95.5%)  | 7.7<br>(90.5%)  | 9.5<br>(100%)   | 9.5<br>(100%)   | 27.9<br>(93.8%) | 27.9<br>(93.8%) | 75.4<br>(94.5%)  | 67.4<br>(84.4%)  | 52.5<br>(81.3%)  | 49.3<br>(76.3%) | n/a             | n/a            | 5.9<br>(88.4%)  | 4.8<br>(71.8%)  |
|             | 2    | 0.4<br>(4.5%)   | 0.4<br>(5.0%)   | 0.0<br>(0.0%)   | 0.0<br>(0.0%)   | 1.8<br>(6.2%)   | 0.0<br>(0.0%)   | 4.0<br>(5.0%)    | 8.0<br>(10.1%)   | 6.7<br>(10.3%)   | 3.2<br>(5.0%)   | n/a             | n/a            | 0.1<br>(2.1%)   | 1.1<br>(16.6%)  |
|             | 3    | 0.0<br>(0.0%)   | 0.4<br>(4.5%)   | 0.0<br>(0.0%)   | 0.0<br>(0.0%)   | 0.0<br>(0.0%)   | 1.8<br>(6.2%)   | 0.0<br>(0.0%)    | 4.0<br>(5.0%)    | 5.3<br>(8.2%)    | 6.7<br>(10.3%)  | n/a             | n/a            | 0.4<br>(6.0%)   | 0.4<br>(6.3%)   |
|             | 4    | 0.0<br>(0.0%)   | 0.0<br>(0.0%)   | 0.0<br>(0.0%)   | 0.0<br>(0.0%)   | 0.0<br>(0.0%)   | 0.0<br>(0.0%)   | 0.4<br>(0.5%)    | 0.4<br>(0.5%)    | 0.2<br>(0.2%)    | 5.4<br>(8.4%)   | n/a             | n/a            | 0.2<br>(3.6%)   | 0.4<br>(5.4%)   |
|             |      | 0.3<br>(100%)   | 0.3<br>(100%)   | 31.8<br>(85.6%) | 31.8<br>(85.6%) | 62.8<br>(92.7%) | 53.1<br>(78.5%) | 115.3<br>(78.0%) | 87.7<br>(59.4%)  | 105.3<br>(74.6%) | 85.0<br>(60.2%) | 0.5<br>(12.6%)  | 0.0<br>(0.0%)  | 11.8<br>(50.6%) | 10.9<br>(46.7%) |
| Central     | 2    | 0.0<br>(0.0%)   | 0.0<br>(0.0%)   | 3.2<br>(8.7%)   | 0.0<br>(0.0%)   | 3.3<br>(4.9%)   | 11.4<br>(16.8%) | 20.6<br>(13.9%)  | 37.7<br>(25.5%)  | 21.2<br>(15.0%)  | 24.8<br>(17.5%) | 0.0<br>(0.0%)   | 0.5<br>(12.6%) | 10.4<br>(44.5%) | 3.3<br>(14.3%)  |
|             | 3    | 0.0<br>(0.0%)   | 0.0<br>(0.0%)   | 2.2<br>(5.8%)   | 4.8<br>(13.0%)  | 0.0<br>(0.0%)   | 1.6<br>(2.4%)   | 11.5<br>(7.8%)   | 12.0<br>(8.1%)   | 13.4<br>(9.5%)   | 19.7<br>(13.9%) | 1.5<br>(42.5%)  | 0.0<br>(0.0%)  | 0.0<br>(0.0%)   | 8.0<br>(34.1%)  |
|             | 4    | 0.0<br>(0.0%)   | 0.0<br>(0.0%)   | 0.0<br>(0.0%)   | 0.5<br>(1.5%)   | 1.6<br>(2.4%)   | 1.6<br>(2.4%)   | 0.4<br>(0.3%)    | 10.3<br>(7.0%)   | 1.4<br>(1.0%)    | 11.8<br>(8.3%)  | 1.6<br>(44.9%)  | 3.1<br>(87.4%) | 1.1<br>(4.9%)   | 1.1<br>(4.9%)   |
|             |      | 14.5<br>(71.3%) | 12.9<br>(63.4%) | 2.2<br>(92.6%)  | 2.2<br>(92.6%)  | 15.4<br>(35.2%) | 13.5<br>(30.9%) | 11.1<br>(40.4%)  | 9.2<br>(33.6%)   | 11.2<br>(23.1%)  | 9.1<br>(18.7%)  | 0.0<br>(0.0%)   | 0.0<br>(0.0%)  | 2.7<br>(14.9%)  | 2.7<br>(14.9%)  |
| Miami Beach | 2    | 4.8<br>(23.7%)  | 3.2<br>(15.8%)  | 0.0<br>(0.0%)   | 0.0<br>(0.0%)   | 13.2<br>(30.1%) | 1.9<br>(4.3%)   | 3.6<br>(13.2%)   | 0.3<br>(0.9%)    | 2.0<br>(4.1%)    | 2.1<br>(4.4%)   | 0.7<br>(24.1%)  | 0.7<br>(24.1%) | 1.5<br>(8.4%)   | 0.0<br>(0.0%)   |
|             | 3    | 1.0<br>(5.0%)   | 3.2<br>(15.8%)  | 0.2<br>(6.6%)   | 0.0<br>(0.0%)   | 9.3<br>(21.2%)  | 13.2<br>(30.1%) | 4.0<br>(14.5%)   | 5.2<br>(19.1%)   | 14.3<br>(29.4%)  | 4.6<br>(9.5%)   | 0.0<br>(0.0%)   | 0.0<br>(0.0%)  | 6.9<br>(39.1%)  | 1.8<br>(9.9%)   |
|             | 4    | 0.0<br>(0.0%)   | 1.0<br>(5.0%)   | 0.0<br>(0.8%)   | 0.2<br>(7.4%)   | 5.9<br>(13.5%)  | 15.2<br>(34.7%) | 8.7<br>(31.8%)   | 12.7<br>(46.4%)  | 21.1<br>(43.4%)  | 32.8<br>(67.4%) | 2.1<br>(75.9%)  | 2.1<br>(75.9%) | 6.7<br>(37.6%)  | 13.4<br>(75.1%) |
|             |      | 49.2<br>(89.0%) | 47.6<br>(86.1%) | 21.7<br>(100%)  | 21.7<br>(100%)  | 55.5<br>(80.0%) | 40.3<br>(58.0%) | 138.9<br>(84.1%) | 100.9<br>(61.1%) | 102.3<br>(69.9%) | 81.8<br>(55.9%) | 5.3<br>(100%)   | 2.2<br>(41.7%) | 18.3<br>(44.4%) | 9.1<br>(22.1%)  |
| North       | 2    | 6.1<br>(11.0%)  | 3.2<br>(5.8%)   | 0.0<br>(0.0%)   | 0.0<br>(0.0%)   | 12.3<br>(17.7%) | 20.1<br>(28.9%) | 23.1<br>(14.0%)  | 45.4<br>(27.5%)  | 31.5<br>(21.5%)  | 28.1<br>(19.2%) | 0.0<br>(0.0%)   | 3.1<br>(58.3%) | 11.1<br>(26.9%) | 9.6<br>(23.2%)  |
|             | 3    | 0.0<br>(0.0%)   | 4.5<br>(8.1%)   | 0.0<br>(0.0%)   | 0.0<br>(0.0%)   | 0.0<br>(0.0%)   | 7.5<br>(10.7%)  | 3.1<br>(1.9%)    | 15.9<br>(9.6%)   | 8.7<br>(5.9%)    | 26.4<br>(18.0%) | 0.0<br>(0.0%)   | 0.0<br>(0.0%)  | 10.2<br>(24.8%) | 13.9<br>(33.7%) |
|             | 4    | 0.0<br>(0.0%)   | 0.0<br>(0.0%)   | 0.0<br>(0.0%)   | 0.0<br>(0.0%)   | 1.6<br>(2.3%)   | 1.6<br>(2.3%)   | 0.1<br>(0.1%)    | 3.0<br>(1.8%)    | 3.9<br>(2.7%)    | 10.2<br>(6.9%)  | 0.0<br>(0.0%)   | 0.0<br>(0.0%)  | 1.6<br>(3.9%)   | 8.7<br>(21.0%)  |

|            |       |                 |                 |                 |                 |                 |                 |                 |                 |                 |                  |                  |                 |                 |                  |
|------------|-------|-----------------|-----------------|-----------------|-----------------|-----------------|-----------------|-----------------|-----------------|-----------------|------------------|------------------|-----------------|-----------------|------------------|
| North-west | 1     | 17.5<br>(64.4%) | 15.9<br>(58.5%) | 59.2<br>(96.1%) | 55.4<br>(89.8%) | 37.7<br>(42.7%) | 24.9<br>(28.1%) | 39.9<br>(41.7%) | 9.7<br>(10.1%)  | 12.9<br>(11.6%) | 3.9<br>(3.5%)    | 0.0<br>(0.0%)    | 0.0<br>(0.0%)   | 10.5<br>(54.7%) | 2.4<br>(12.4%)   |
|            | 2     | 4.8<br>(17.8%)  | 4.8<br>(17.8%)  | 0.0<br>(0.0%)   | 3.9<br>(6.3%)   | 17.0<br>(19.2%) | 23.7<br>(26.8%) | 41.3<br>(43.1%) | 44.1<br>(46.1%) | 42.6<br>(38.2%) | 24.2<br>(21.7%)  | 4.0<br>(28.2%)   | 0.0<br>(0.0%)   | 6.6<br>(34.5%)  | 13.1<br>(68.0%)  |
|            | 3     | 4.8<br>(17.8%)  | 3.2<br>(11.9%)  | 2.2<br>(3.5%)   | 1.6<br>(2.6%)   | 16.3<br>(18.4%) | 19.9<br>(22.5%) | 11.3<br>(11.8%) | 35.5<br>(37.1%) | 40.4<br>(36.3%) | 47.6<br>(42.8%)  | 7.5<br>(53.0%)   | 8.5<br>(59.8%)  | 1.7<br>(8.9%)   | 3.4<br>(17.8%)   |
|            | 4     | 0.0<br>(0.0%)   | 3.2<br>(11.9%)  | 0.2<br>(0.4%)   | 0.8<br>(1.3%)   | 17.4<br>(19.6%) | 19.9<br>(22.5%) | 3.2<br>(3.4%)   | 6.4<br>(6.7%)   | 15.5<br>(13.9%) | 35.7<br>(32.1%)  | 2.7<br>(18.8%)   | 5.7<br>(40.2%)  | 0.4<br>(1.9%)   | 0.4<br>(1.9%)    |
|            | South | 1               | n/a             | n/a             | 37.0<br>(100%)  | 35.4<br>(95.6%) | 66.3<br>(80.2%) | 55.0<br>(66.5%) | 79.6<br>(81.1%) | 70.1<br>(71.4%) | 188.2<br>(73.5%) | 154.4<br>(60.3%) | 41.5<br>(59.2%) | 37.2<br>(53.0%) | 103.2<br>(60.5%) |
| 2          |       | n/a             | n/a             | 0.0<br>(0.0%)   | 1.6<br>(4.4%)   | 11.6<br>(14.0%) | 21.3<br>(25.7%) | 15.9<br>(16.2%) | 17.1<br>(17.4%) | 53.1<br>(20.8%) | 59.9<br>(23.4%)  | 16.7<br>(23.7%)  | 15.6<br>(22.3%) | 40.6<br>(23.8%) | 34.3<br>(20.1%)  |
| 3          |       | n/a             | n/a             | 0.0<br>(0.0%)   | 0.0<br>(0.0%)   | 4.8<br>(5.8%)   | 6.4<br>(7.8%)   | 1.7<br>(1.7%)   | 10.0<br>(10.1%) | 13.0<br>(5.1%)  | 36.7<br>(14.4%)  | 8.9<br>(12.7%)   | 12.7<br>(18.0%) | 22.2<br>(13.0%) | 40.8<br>(23.9%)  |
| 4          |       | n/a             | n/a             | 0.0<br>(0.0%)   | 0.0<br>(0.0%)   | 0.0<br>(0.0%)   | 0.0<br>(0.0%)   | 1.0<br>(1.0%)   | 1.0<br>(1.0%)   | 1.6<br>(0.6%)   | 4.9<br>(1.9%)    | 3.1<br>(4.4%)    | 4.7<br>(6.7%)   | 4.7<br>(2.8%)   | 8.5<br>(5.0%)    |
| West       |       | 1               | n/a             | n/a             | 60.8<br>(95.0%) | 57.6<br>(90.1%) | 52.2<br>(80.1%) | 49.0<br>(75.1%) | 62.4<br>(63.0%) | 45.2<br>(45.7%) | 47.5<br>(27.8%)  | 32.4<br>(19.0%)  | 0.0<br>(0.0%)   | 0.0<br>(0.0%)   | 5.3<br>(23.3%)   |
|            | 2     | n/a             | n/a             | 1.6<br>(2.5%)   | 3.1<br>(4.9%)   | 9.0<br>(13.8%)  | 8.0<br>(12.3%)  | 33.3<br>(33.7%) | 34.6<br>(34.9%) | 87.0<br>(51.0%) | 60.4<br>(35.4%)  | 0.8<br>(14.7%)   | 0.0<br>(0.0%)   | 13.1<br>(57.0%) | 6.0<br>(26.2%)   |
|            | 3     | n/a             | n/a             | 1.6<br>(2.5%)   | 3.2<br>(5.0%)   | 0.0<br>(0.0%)   | 4.2<br>(6.4%)   | 3.3<br>(3.3%)   | 19.2<br>(19.4%) | 35.4<br>(20.7%) | 71.2<br>(41.7%)  | 4.8<br>(85.3%)   | 5.3<br>(93.4%)  | 3.3<br>(14.5%)  | 7.7<br>(33.8%)   |
|            | 4     | n/a             | n/a             | 0.0<br>(0.0%)   | 0.0<br>(0.0%)   | 4.0<br>(6.2%)   | 4.0<br>(6.2%)   | 0.0<br>(0.0%)   | 0.0<br>(0.0%)   | 0.8<br>(0.5%)   | 6.8<br>(4.0%)    | 0.0<br>(0.0%)    | 0.4<br>(6.6%)   | 1.2<br>(5.2%)   | 4.2<br>(18.4%)   |
